# Supplementary material
Source: PubMed Central journal article supplement (PMC9391268)
Supplement: NIHMS1792608-supplement-1792608_Sup_Figures.pdf [file NIHMS1792608-supplement-1792608_Sup_Figures.pdf]

## **Supplementary Figures**

### **Macrophage-intrinsic DUOX1 contributes to type 2 inflammation and mucus metaplasia during allergic airway disease**

Carolyn R. Morris, Aida Habibovic, Christopher M. Dustin, Caspar Schiffers, Miao-Chong Lin, Jennifer L. Ather, Yvonne M.W. Janssen-Heininger, Matthew E. Poynter, Olaf Utermohlen, Martin Krönke, and Albert van der Vliet

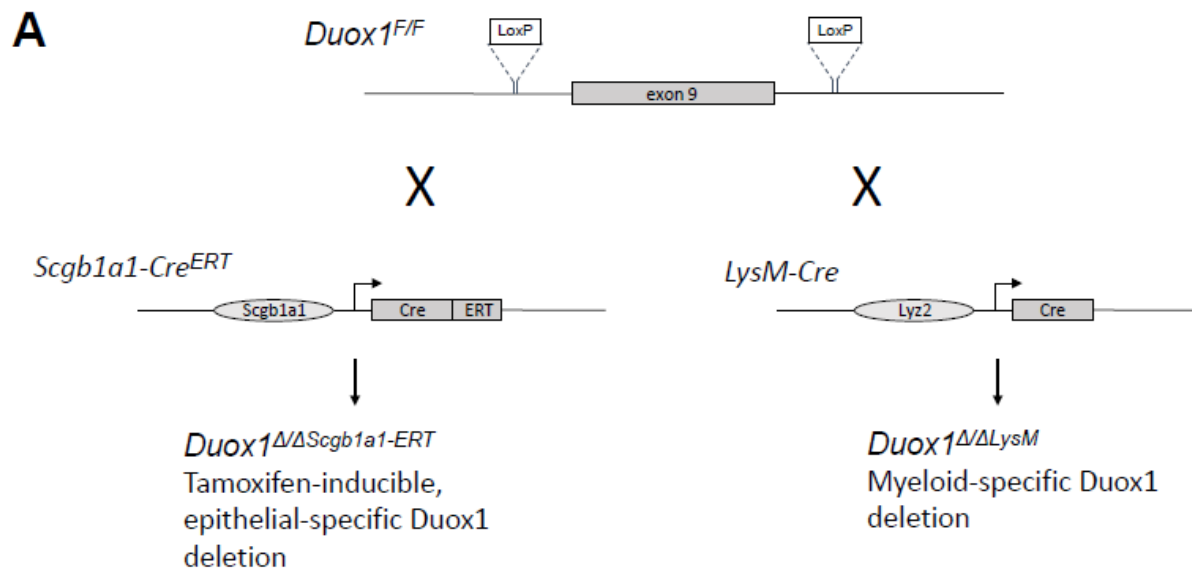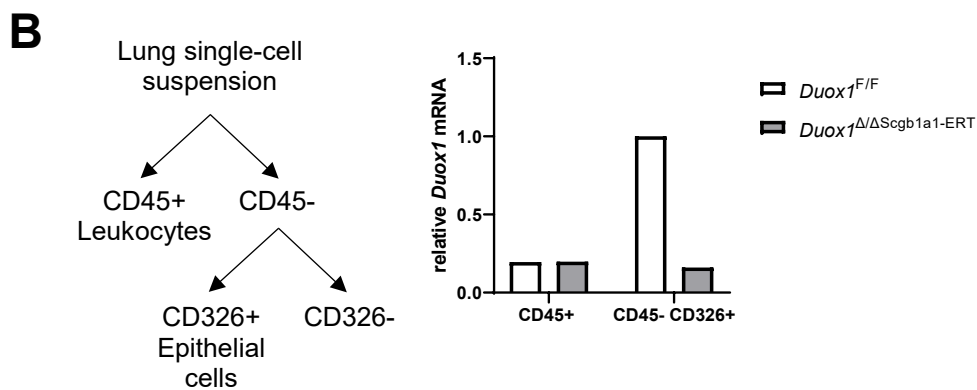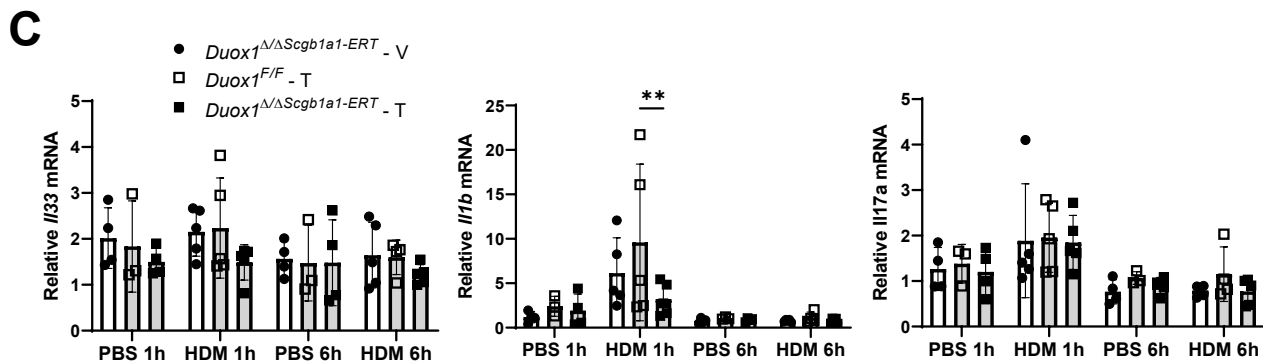

**Supplementary Figure 1:** (A) Schematic illustration of mouse lines used in this study. (B) Confirmation of selective *Duox1* ablation in CD326+ epithelial cells from tamoxifen-treated *Duox1<sup>ΔΔScgb1a1-ERT</sup>* mice. Average results of duplicate analyses are shown. (C) RT-PCR analysis of *Il1b*, *Il33*, and *Il17a* mRNA in lung tissues from *Duox1<sup>F/F</sup>* or *Duox1<sup>ΔΔScgb1a1-ERT</sup>* mice, pretreated with either tamoxifen (T) or vehicle control (V), following acute intranasal HDM challenge. \*\*:  $p < 0.01$ .

**A**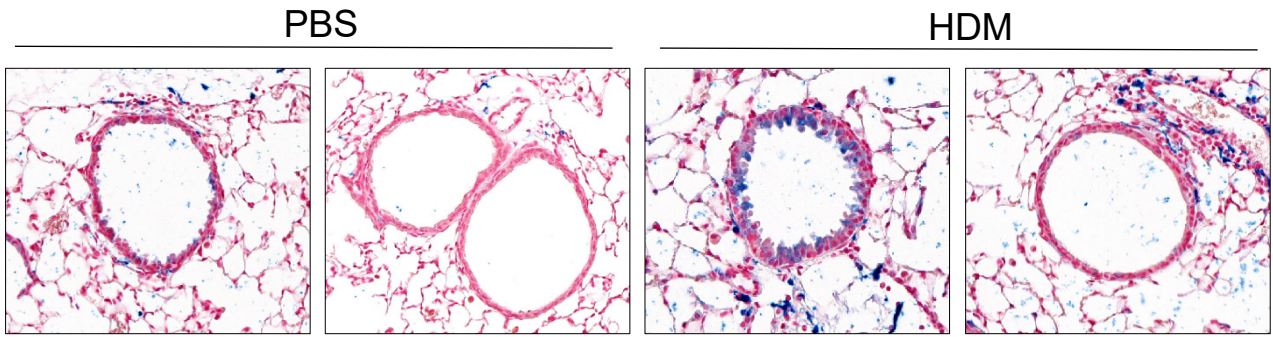**B**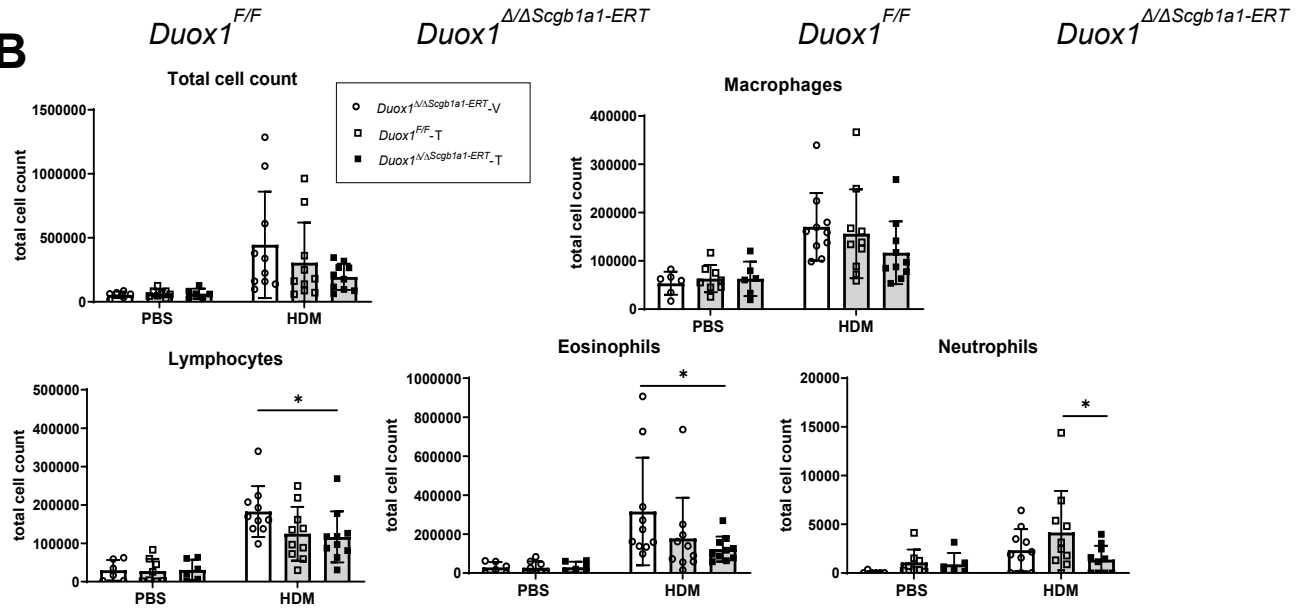**C**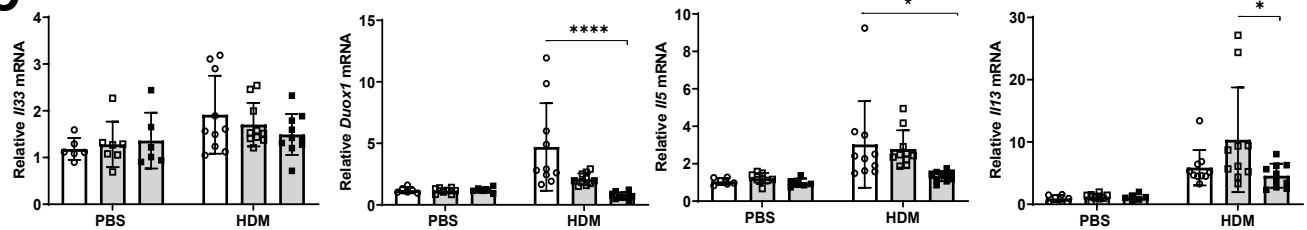**D**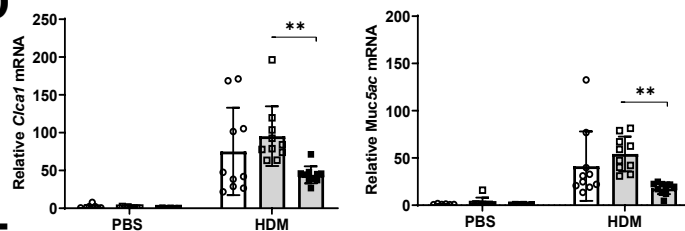**E**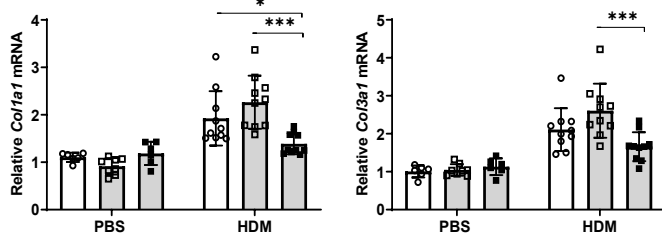

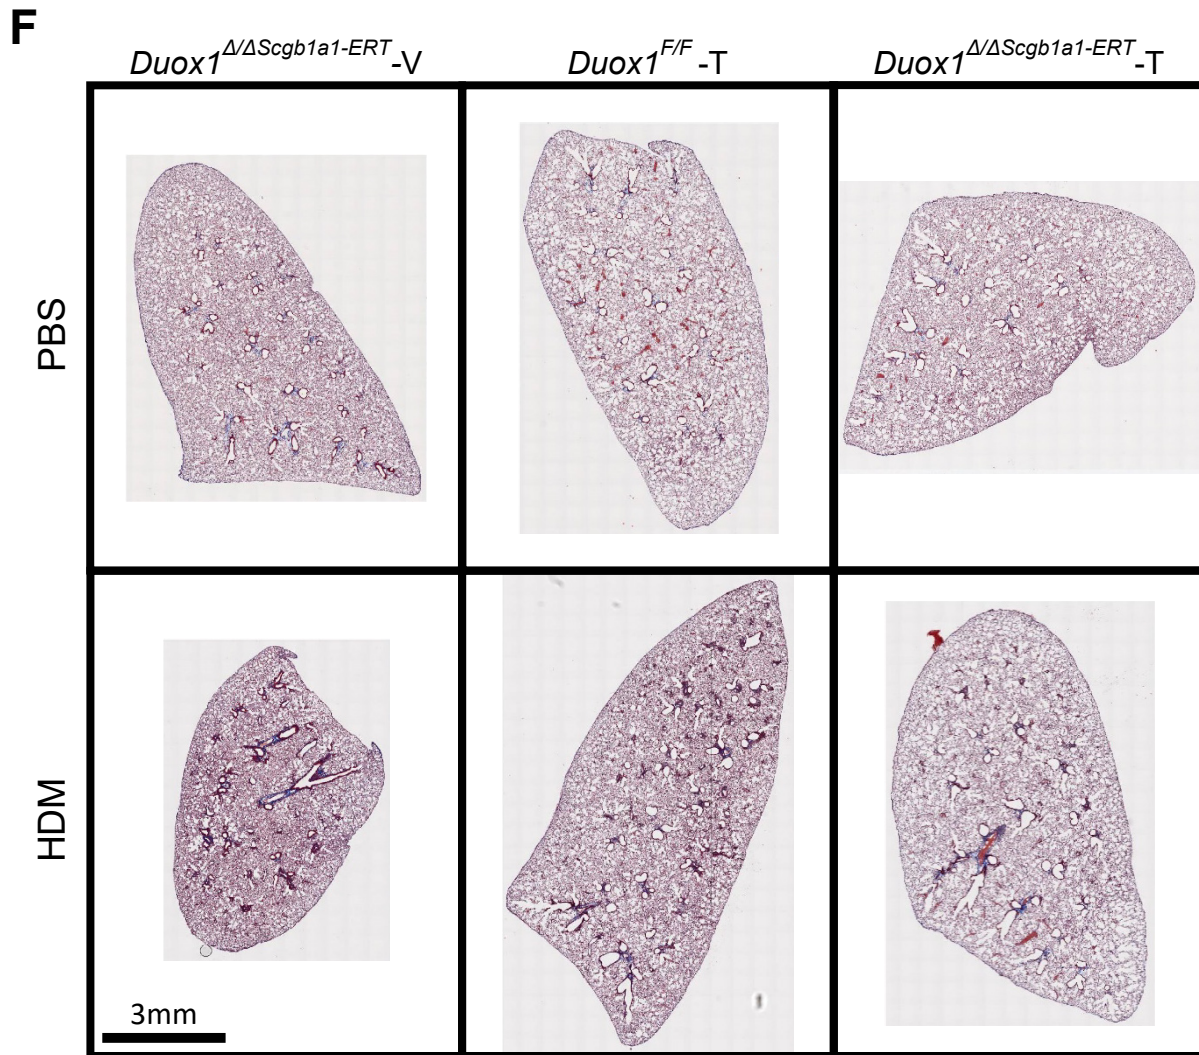

**Supplementary Figure 2:** Epithelial DUOX1 ablation attenuates type 2 inflammation and airway remodeling during repeated HDM challenge. *Duox1*<sup>F/F</sup> or *Duox1*<sup>Δ/ΔScgb1a1-ERT</sup> mice pretreated with either tamoxifen (T) or vehicle control (V) were subjected to repeated intranasal HDM or PBS. **(A)** Immunohistochemical analysis of DUOX1 protein in tamoxifen-treated *Duox1*<sup>F/F</sup> or *Duox1*<sup>Δ/ΔScgb1a1-ERT</sup> mice following repeated PBS or HDM challenge, revealing selective ablation of DUOX1 within the epithelium. **(B)** Quantification of BAL inflammatory cell types. **(C-E)** Lung tissue analysis of mRNA levels of genes related to type 2 inflammation **(C)**, mucus metaplasia **(D)**, and collagen production **(E)**. **(F)** Whole slide images of representative full lung sections following Masson's trichrome staining. \*: p<0.05; \*\*: p<0.01; \*\*\*: p<0.001; \*\*\*\*: p<0.0001.

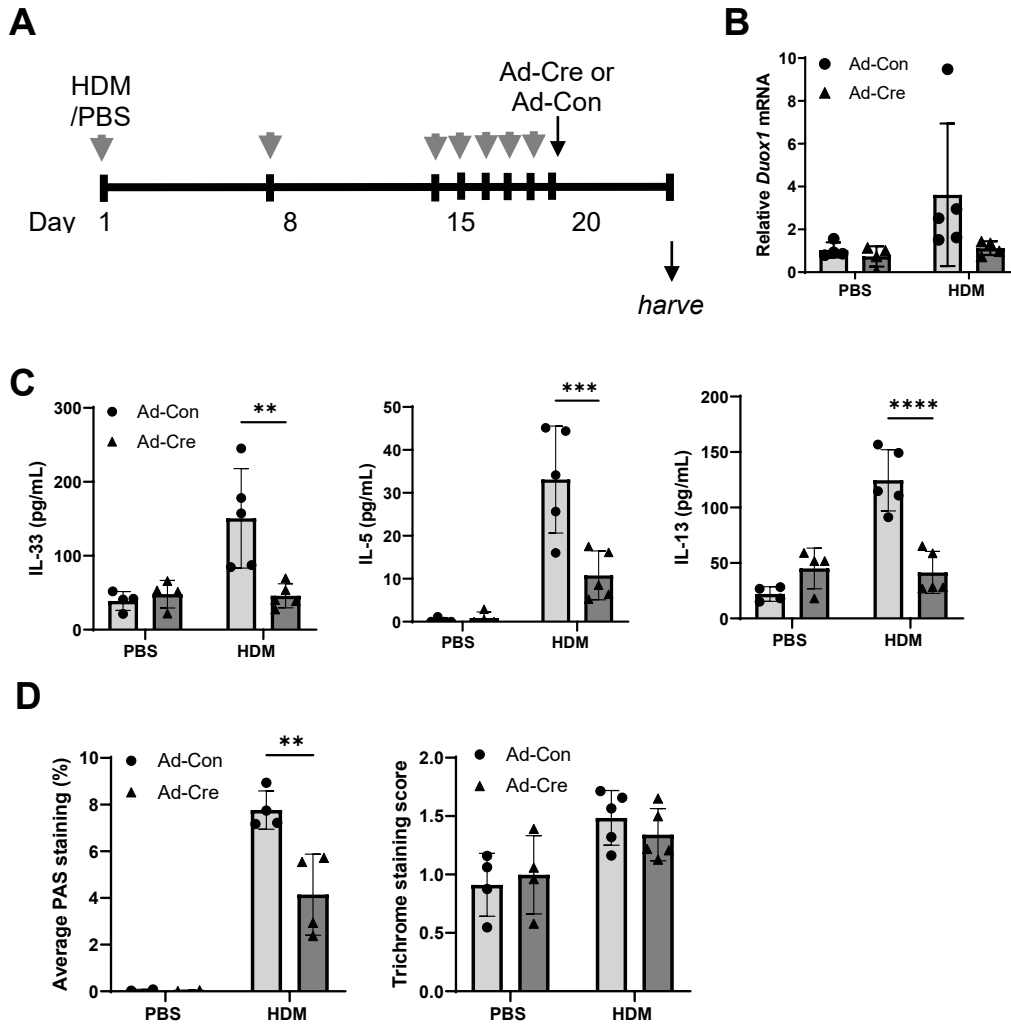

**Supplementary Figure 3: DUOX1 ablation during ongoing allergic airway inflammation promotes resolution of inflammation and remodeling. (A)** Schematic of experimental design and timeline of HDM and Adeno-Cre administration. **(B)** Analysis of lung tissue *Duox1* mRNA expression. **(C)** ELISA analysis of type cytokines in BAL fluids. **(D)** Quantification of PAS staining and Masson's trichrome staining. \*\*:  $p < 0.01$ ; \*\*\*:  $p < 0.001$ ; \*\*\*\*:  $p < 0.0001$ .

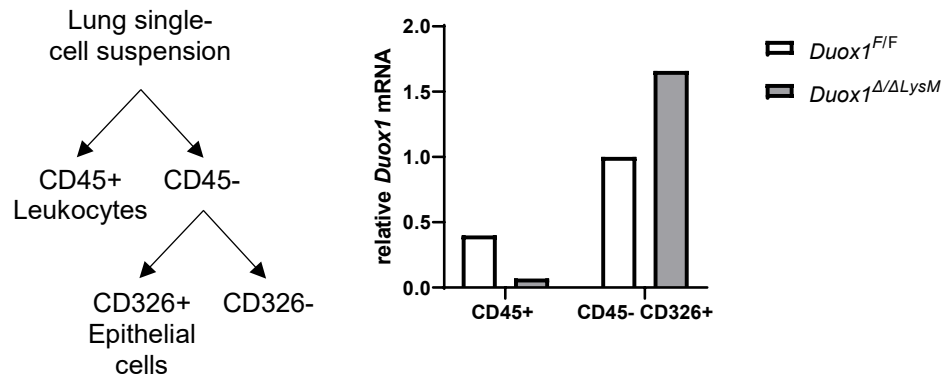

Supplementary Figure 4: Analysis of selective *Duox1* ablation in CD45+ cells but not CD326+ epithelial cells from *Duox1*<sup>Δ/ΔLysM</sup> mice. Average results of duplicate analyses are shown.

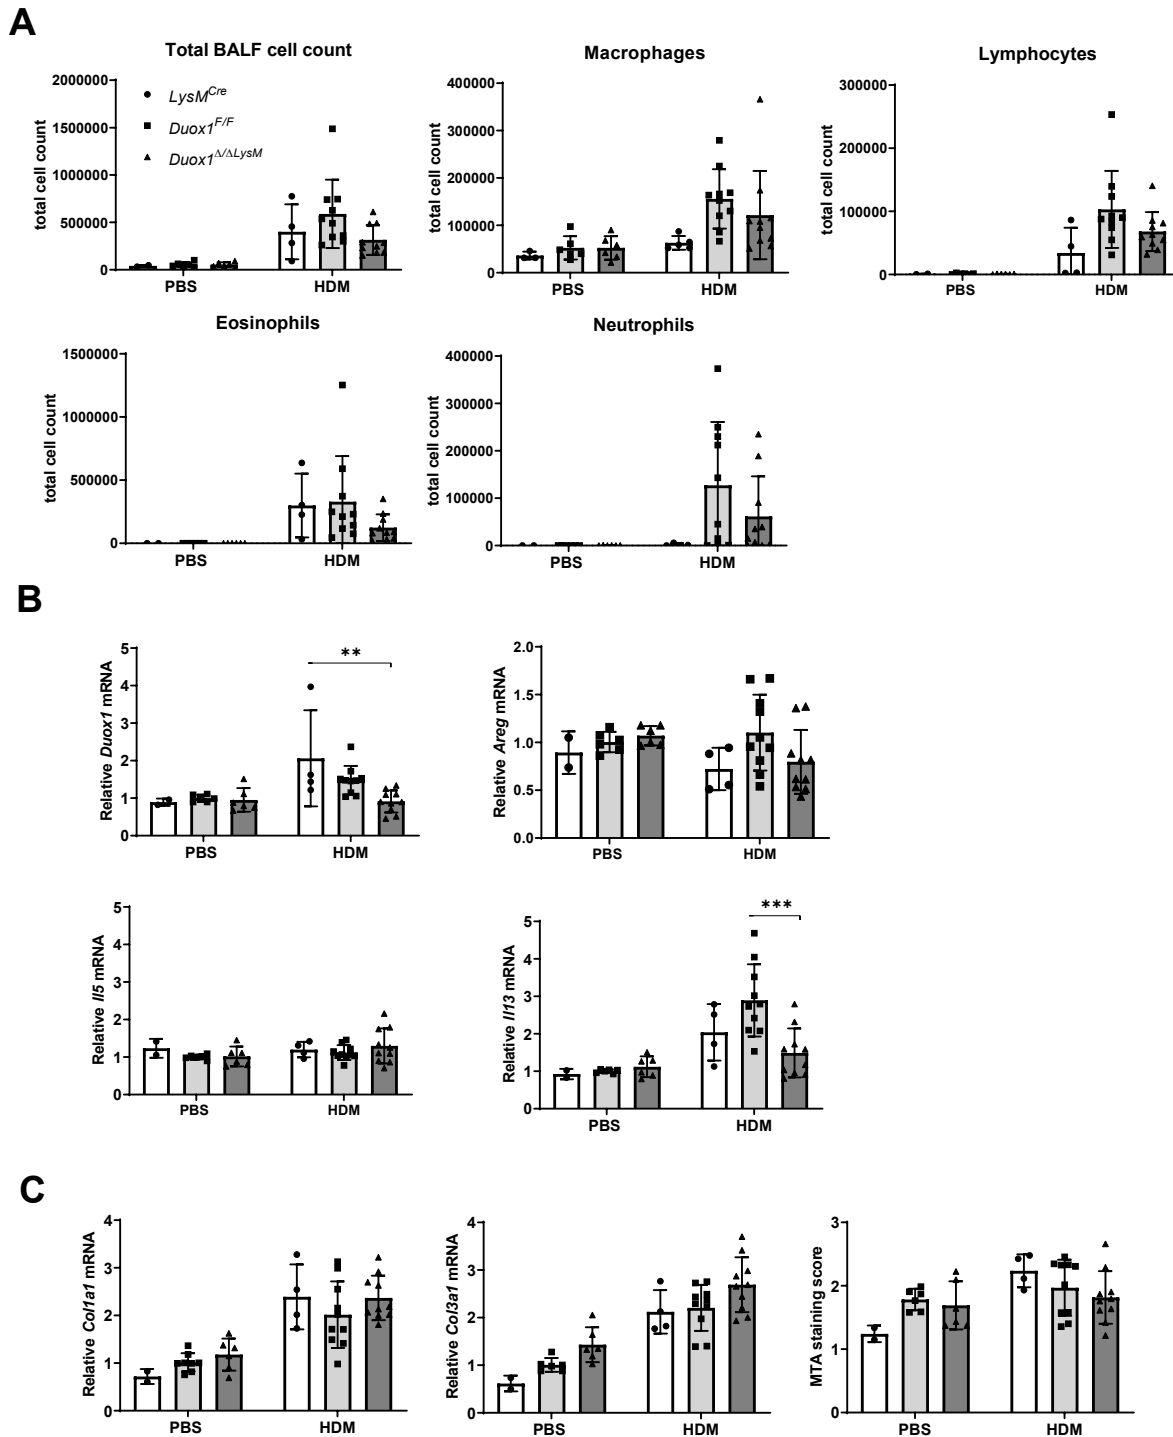

**Supplementary Figure 5:** Selective ablation of myeloid DUOX1 attenuates type 2 inflammation and mucus metaplasia during chronic HDM challenge. *Duox1*<sup>Δ/ΔLysM</sup> mice and *LysM*<sup>Cre+/-</sup> or *Duox1*<sup>F/F</sup> as controls, were subjected to repeated challenge with HDM or PBS, and BAL fluid were analysed for inflammatory cell counts (**A**), and lung tissues were analyzed for mRNA levels of genes related to type 2 inflammation (**B**). (**C**) Lung tissue analysis of mRNA levels of collagen genes or Masson's trichrome staining. \*\*: p<0.01; \*\*\*: p<0.001.

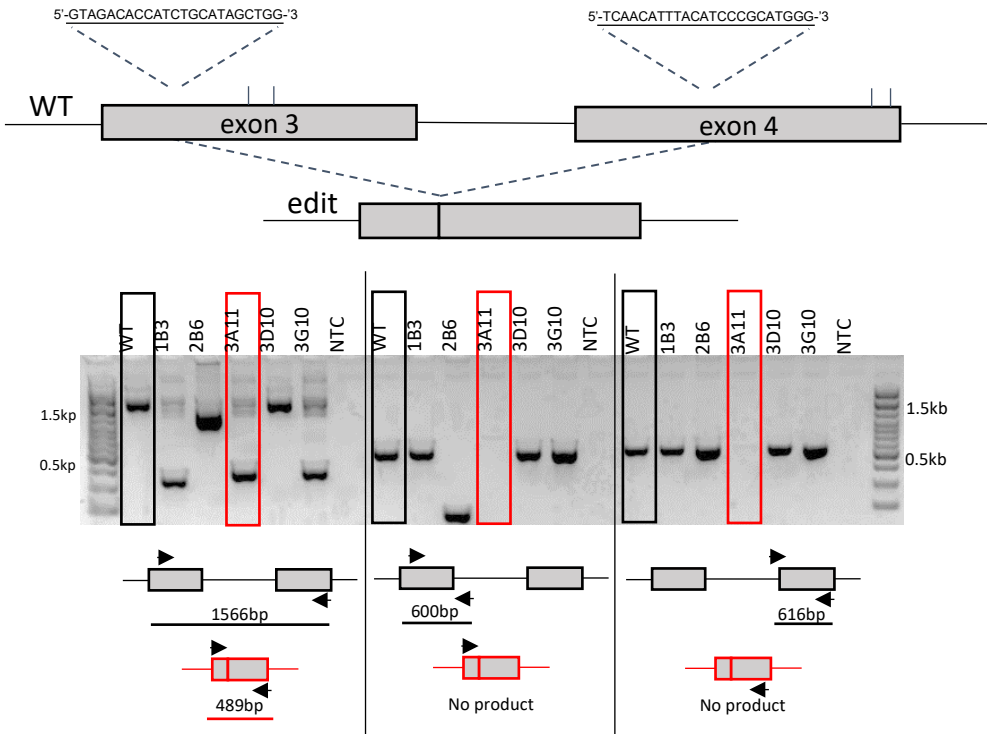

Supplementary Figure 6: Schematic of *Duox1* editing and screening in MH-S cell clones.



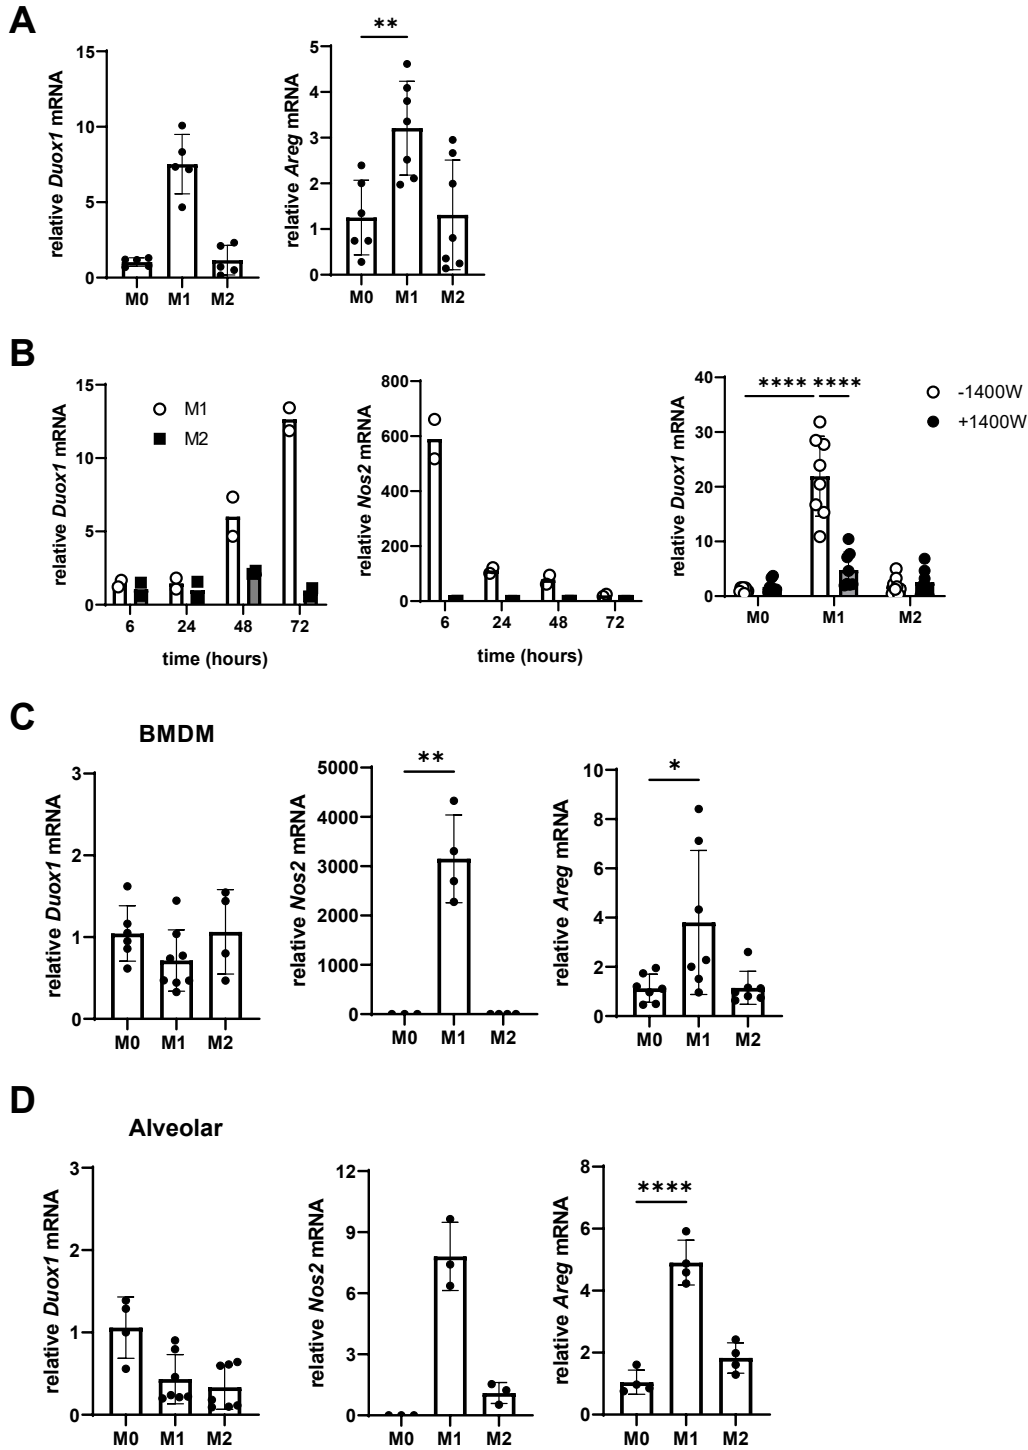

Supplementary Figure 7: Impact of M1/M2 polarization on macrophage *Duox1* expression. MH-S cells were subjected to M1 or M2 polarization for 48 hrs (A) or indicated times (B), and analyzed for mRNA expression of *Duox1* or M1 markers *Nos2* or *Areg*. (B, right panel) Impact of NOS2 inhibition by 1400W on *Duox1* mRNA during 72-hr M1 polarization. (C,D) Impact of 48-hr M1/M2 polarization of mouse bone marrow-derived macrophages (BMDM) or alveolar macrophages on *Duox1*, *Nos2* or *Areg*. \*:  $p < 0.05$ ; \*\*:  $p < 0.01$ ; \*\*\*\*:  $p < 0.0001$ .
